# Supplementary material
Source: publisher figshare collection journal article supplement (https://sage.figshare.com/ndownloader/files/16861808)
Supplement: Supplementary file 1 [file 16861808]

Liu H, et al. Histologic findings and viral antigen distribution in natural coinfection of layer hens with subgroup J avian leukosis virus, Marek's disease virus, and reticuloendotheliosis virus

**Supplementary Table 1.** Primers used for detection of subgroup J avian leukosis virus (ALV-J), Marek's disease virus (MDV), and reticuloendotheliosis virus (REV).

| Name               | Sequence                                                           | Length (bp) |
|--------------------|--------------------------------------------------------------------|-------------|
| ALV-J- <i>gp85</i> | 5-GGAGTTCATCTATTGCAACAACCGA-3<br>5-GCGCCTGCTAACGGTGGTGACC-3        | 924         |
| ALV-A- <i>env</i>  | 5-GGTTGGTCTAGACAGGAAGC-3<br>5-CATTGCCACAGCGGTAC-3                  | 180         |
| ALV-B- <i>env</i>  | 5-CATACGATAGTCCGGCTG-3<br>5-CCCCACACATCCTGACA-3                    | 260         |
| MDV- <i>meq</i>    | 5-CGCGAATTCTACAGGTGTAAAGAGATG-3<br>5-TAACTCGAGTGCTGAGAGTCACAATGC-3 | 1,058       |
| REV-ITR            | 5-CATACTGGAGCCAATGGTT-3<br>5-AATGTTGTAGCGAAGTACT-3                 | 300         |
| BLSV-ORF3          | 5-GCTTGATTTACAACCCACC-3<br>5- GGCATCAGTAACCCCAAT-3                 | 375         |

|                                                                                                   |  |                                                                                                                                                                           |    |    |     |     |     |     |     |  |  |
|---------------------------------------------------------------------------------------------------|--|---------------------------------------------------------------------------------------------------------------------------------------------------------------------------|----|----|-----|-----|-----|-----|-----|--|--|
| <div><div><div></div><div></div><div></div><div></div><div></div></div><div>Consensus</div></div> |  | RDAARRRRRREQTDYVDKLHEACEELQRECTSLRAQLACHETTPHDP RPPDTEPLQPPICTPA                                                                                                          |    |    |     |     |     |     |     |  |  |
| 12 Sequences                                                                                      |  | 70                                                                                                                                                                        | 80 | 90 | 110 | 120 | 140 | 180 | 210 |  |  |
| 648A                                                                                              |  | RDAARRRRRKQTDYVDKLHEACEELQRECTSLRVQLARHETTPHDPAPPDAEPLQPPICTPA                                                                                                            |    |    |     |     |     |     |     |  |  |
| 814                                                                                               |  | RDA <span>S</span> RRRRRREQTDYVDKLHEACEELQRECTSLRA <span>A</span> QLACHETTPHNPPPPDTEPLQPPICTPP                                                                            |    |    |     |     |     |     |     |  |  |
| AN-1                                                                                              |  | RDAARRRRRREQT <span>Y</span> YVDKLHE <span>T</span> CEEL <span>R</span> RECTSLRA <span>A</span> QLACHET <span>A</span> PHDP <span>R</span> PPDTEPLQPPICTPA <span>A</span> |    |    |     |     |     |     |     |  |  |
| CU-2                                                                                              |  | RDASRRRRRREQTDYVDKLHEACEELQRECTSLRVQLACHETTPHDP PPPPDTEPLQPPICTPP                                                                                                         |    |    |     |     |     |     |     |  |  |
| CVI988                                                                                            |  | RDASRRRRRREQTDYVDKLHEACEELQRECTSLRVQLACHETTPHDP PPPPDTEPLQPPICTPP                                                                                                         |    |    |     |     |     |     |     |  |  |
| GA                                                                                                |  | RDAARRRRRKQTDYVDKLHEACEELQRECTSLRVQLACHETTPHDP PPPPDTEPLQPPICTPP                                                                                                          |    |    |     |     |     |     |     |  |  |
| Md5                                                                                               |  | RDAARRRRRREQT <span>Y</span> YVDKLHEACEELQRECTSLRA <span>A</span> QLACHETTPHDPLPPDTEPLQPPICTPA <span>A</span>                                                             |    |    |     |     |     |     |     |  |  |
| RB1B                                                                                              |  | RDAARRRRRKQTDYVDKLHEACEELQRECTSLRVQLACHETTPHDP PPPPDTEPLQPPICTPP                                                                                                          |    |    |     |     |     |     |     |  |  |
| QD2014                                                                                            |  | RDAARRRRRREQT <span>Y</span> YVDKLHEACEELQRECTSLRA <span>A</span> QLACHET <span>A</span> PHDP <span>R</span> PPDTEPLQPPICTPA <span>A</span>                               |    |    |     |     |     |     |     |  |  |
| Case 1                                                                                            |  | RDAARRRRRREQT <span>Y</span> YVDKLHE <span>T</span> CEEL <span>R</span> RECTSLRA <span>A</span> QLACHET <span>A</span> PHDP <span>R</span> PPDTEPLQPPICTPA                |    |    |     |     |     |     |     |  |  |
| Case 2                                                                                            |  | RDAARRRRRREQT <span>Y</span> YVDKLHE <span>T</span> CEEL <span>R</span> RECTSLRA <span>A</span> QLACHET <span>A</span> PHDP <span>R</span> PPDTEPLQPPICTPA                |    |    |     |     |     |     |     |  |  |
| Case 3                                                                                            |  | RDAARRRRRREQT <span>Y</span> YVDKLHE <span>T</span> CEEL <span>R</span> RECTSLRA <span>A</span> QLACHET <span>A</span> PHDP <span>R</span> PPDTEPLQPPICTPA                |    |    |     |     |     |     |     |  |  |

**Supplementary Figure 1.** Alignments for the amino acid mutations sites in the Meq protein. CVI988: 6 amino acid sites at residues 71(S), 80(D), 115(V), 139(T), 176(P), 217(P). Cases 1–3: 6 amino acid mutations at residues 71(A), 80(Y), 115(A), 139(A), 176(R), 217(A).

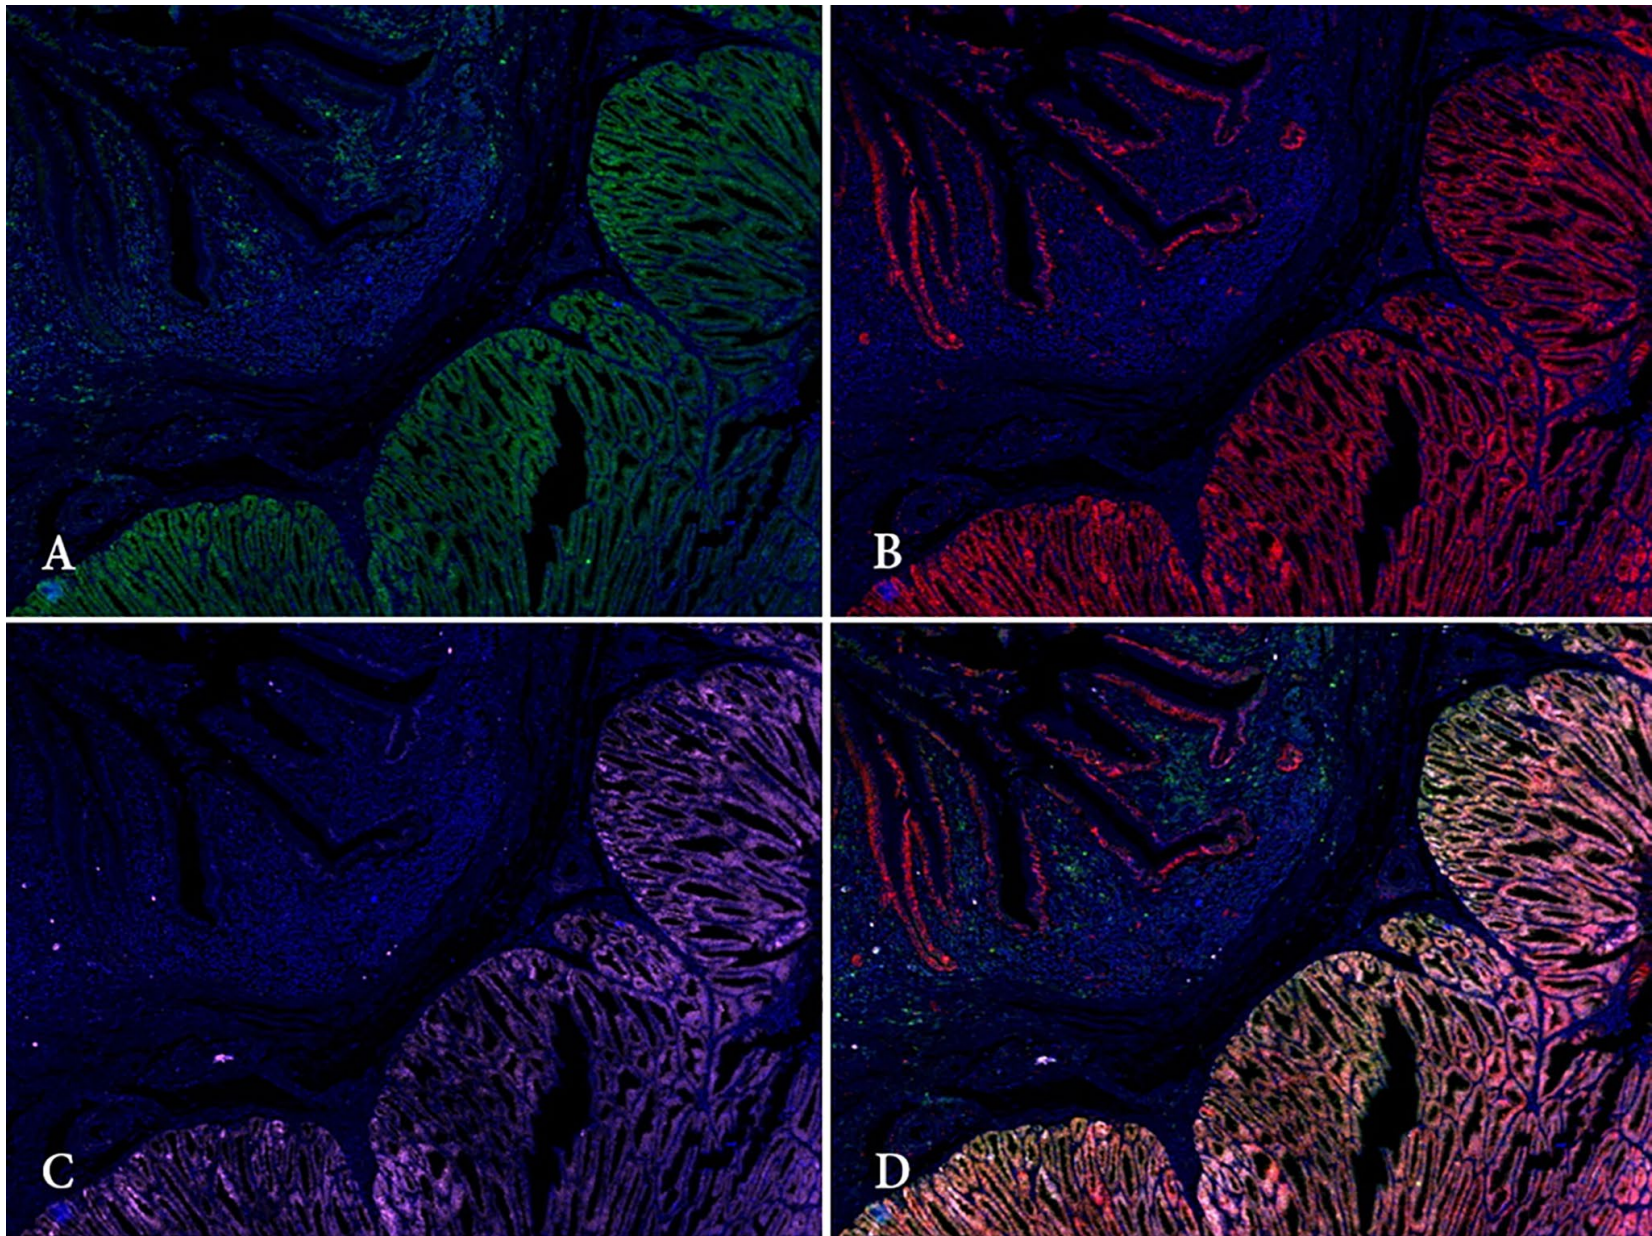

**Supplementary Figure 2.** Fluorescence multiplex immunohistochemistry localization of subgroup J avian leukosis virus (ALV-J), Marek's disease virus (MDV), and reticuloendotheliosis virus (REV) antigens in chicken proventriculus. A–C. Anti-MDV *meq* (1:200), anti-ALV-J *gp85* (1:150), and anti-REV *gp90* (1:200) mouse monoclonal antibodies were respectively used as the primary antibodies. Horseradish peroxidase–conjugated goat anti-mouse IgG was used as the secondary antibody. **A.** Fluorescein isothiocyanate–conjugated tyramide reagent (MDV staining, green fluorescence), **B.** Cy3-conjugated tyramide reagent (ALV-J staining, red fluorescence), and **C.** Cy5-conjugated tyramide reagent (REV staining, pink fluorescence) were used as fluorescent signals for detection of target antigens in tissues and cells. Nuclei were counterstained with DAPI (blue fluorescence). **D.** Antigens are co-localized by image overlay (merged images).
